# Supplementary material for: Synthesis, Anti‐Inflammatory, and Analgesic Activities of Derivatives of 4‐Hydroxy‐2‐benzoxazolone
Source: Hindawi journal article supplement (doi:10.1155/2015/534156), 2015-01-01
Supplement: f1 [file 534156.f1.doc]

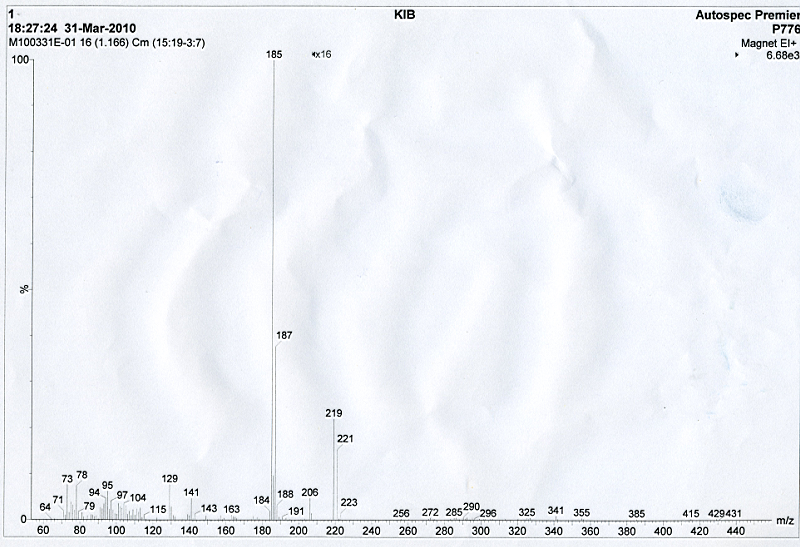


1 TC-2 MS


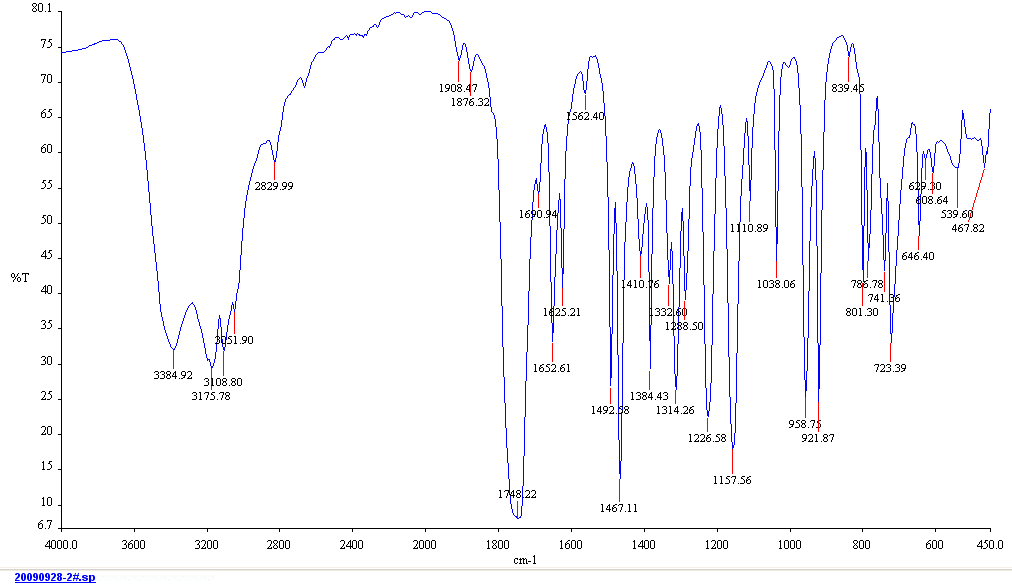


2 TC-2 IR


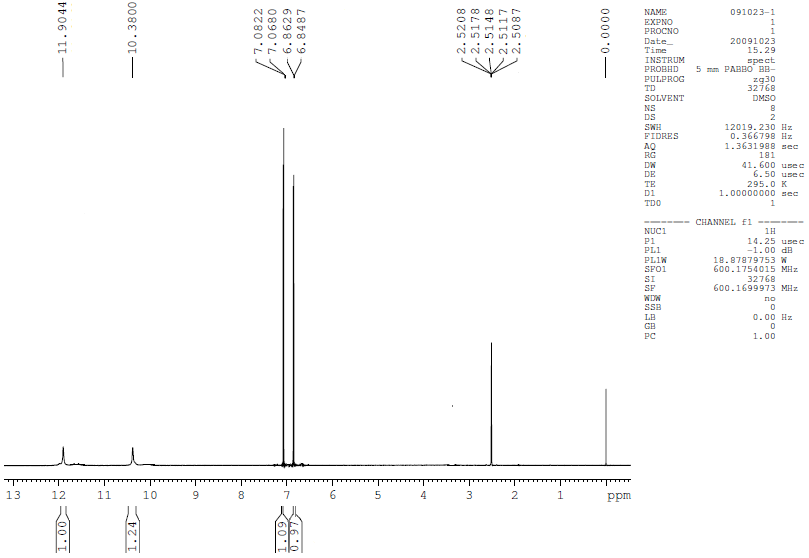


3 TC-2 1HNMR


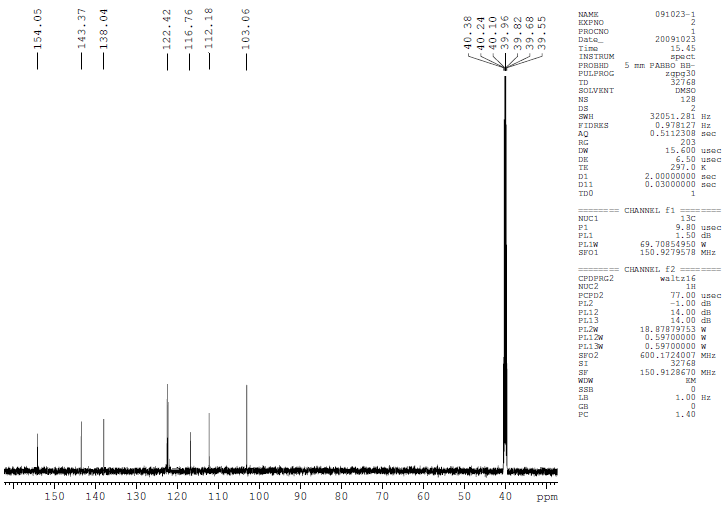


4 TC-2 13CNMR


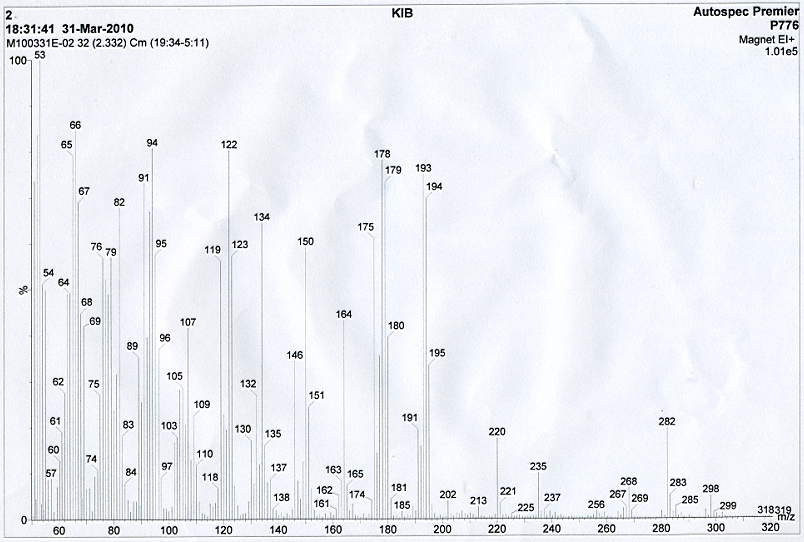


5 TC-3 MS


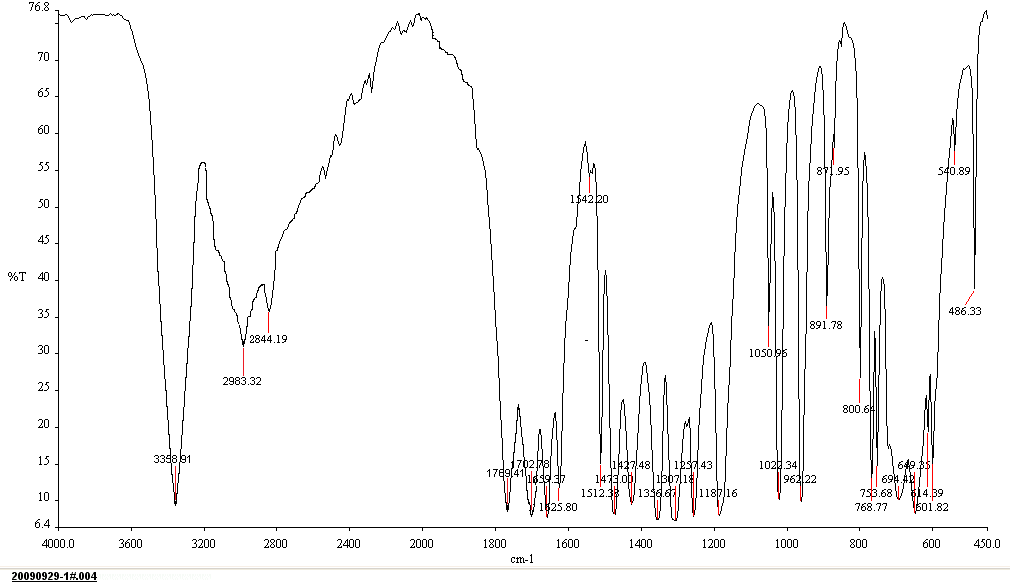


6 TC-3 IR


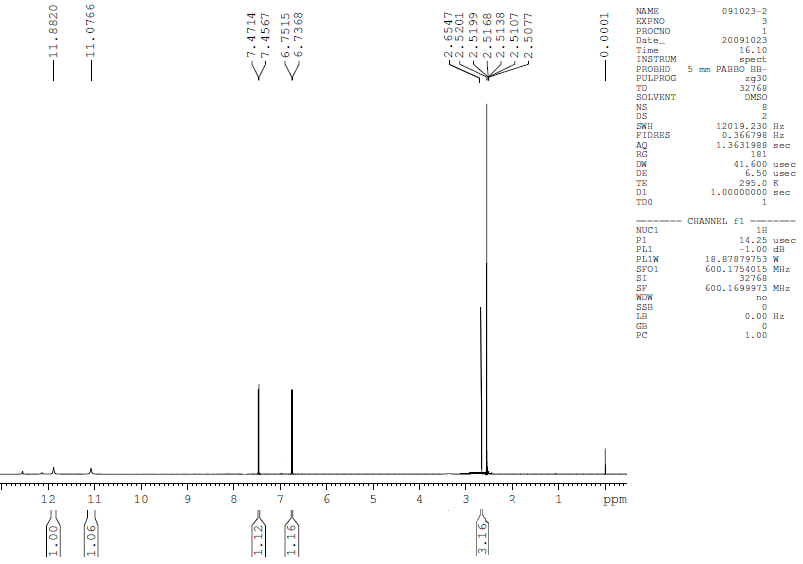


7 TC-3 1HNMR


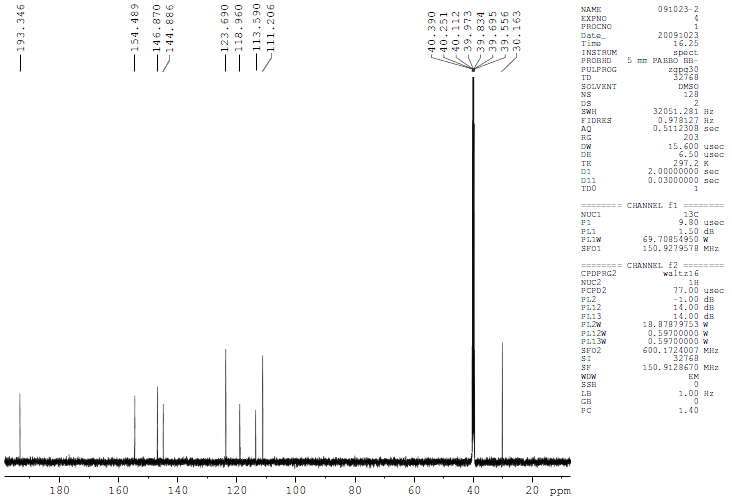


8 TC-3 13CNMR


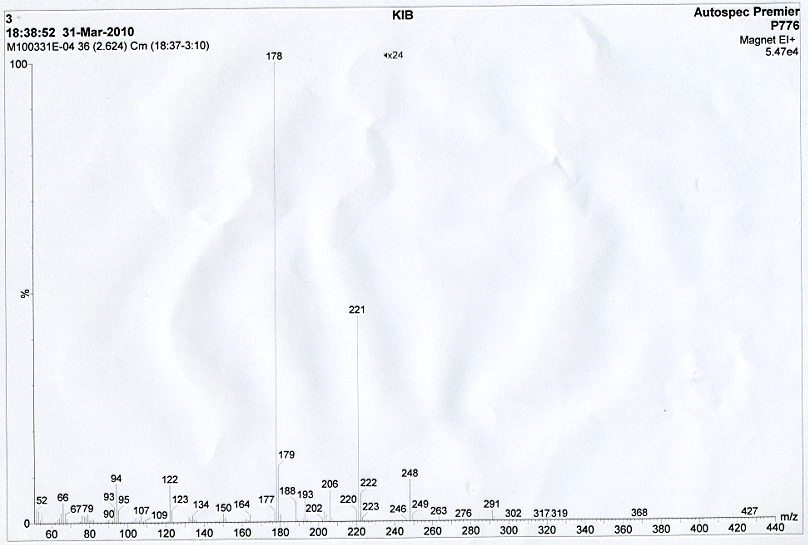


9 TC-4 MS


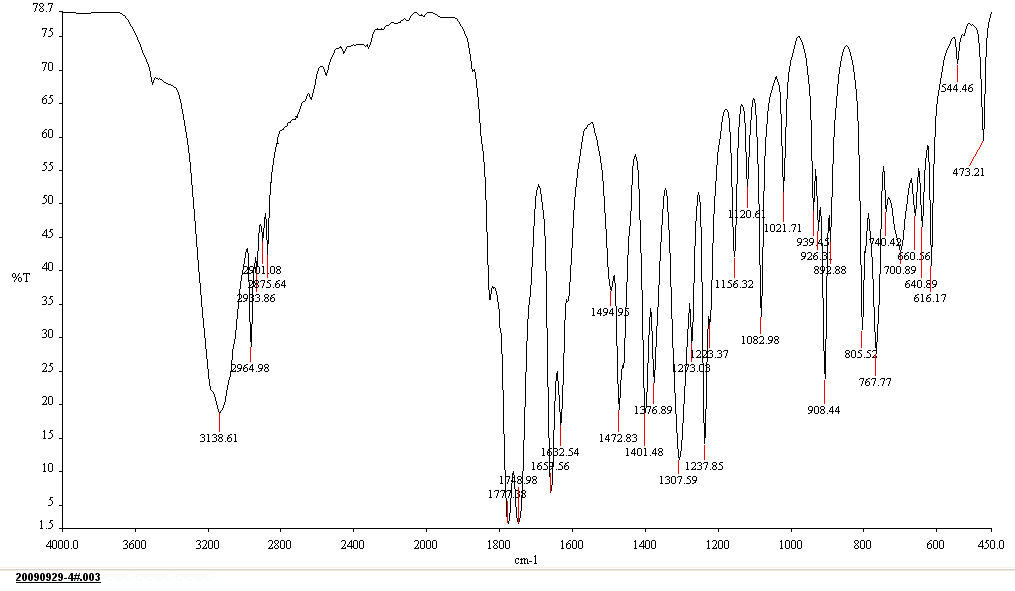


10 TC-4 IR


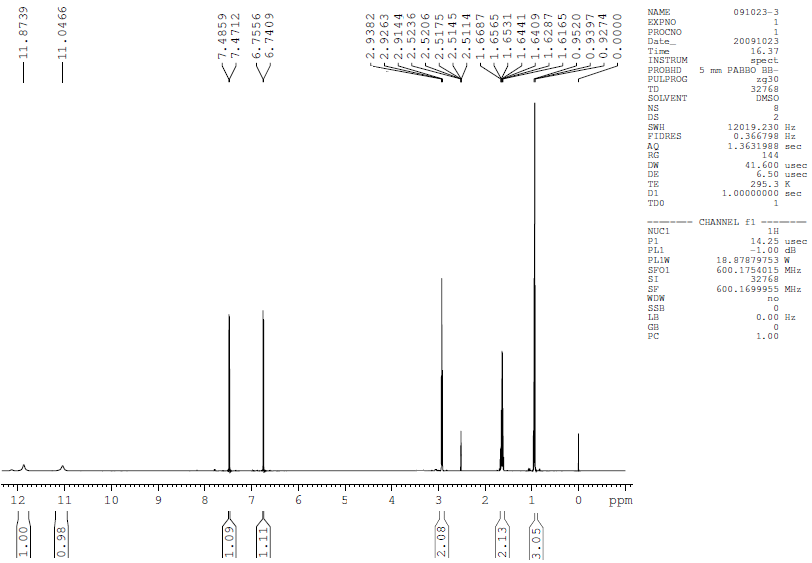


11 TC-4 1HNMR


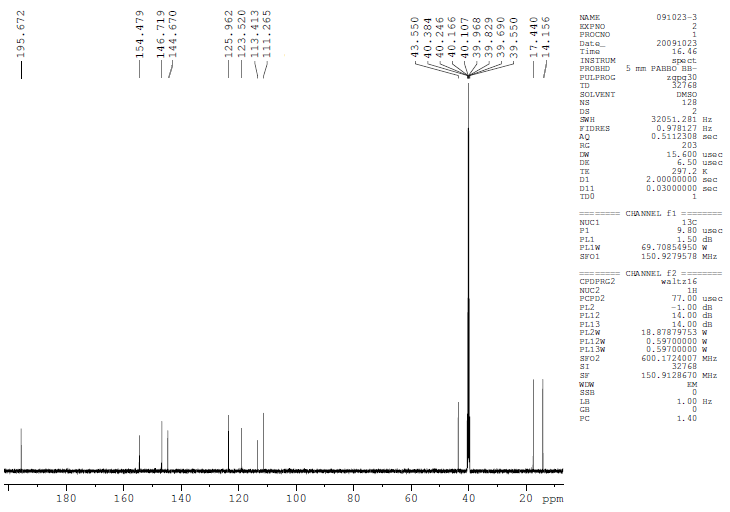


12 TC-4 13CNMR


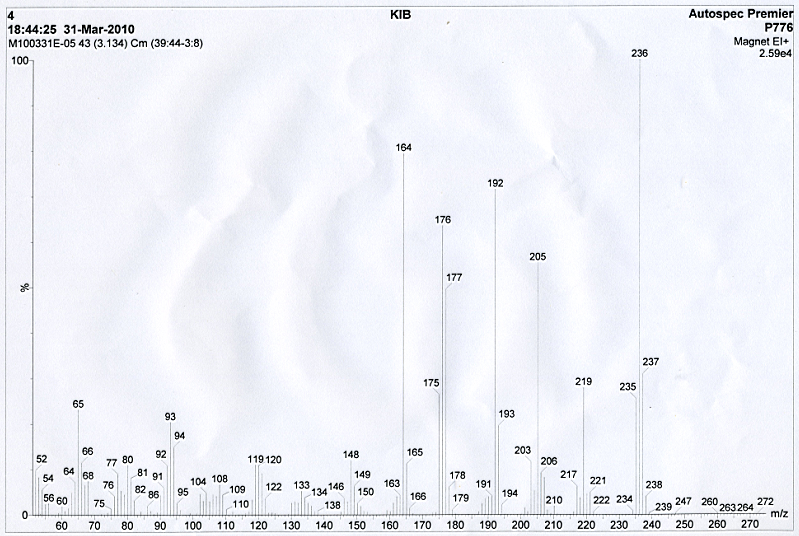


13 TC-5 MS


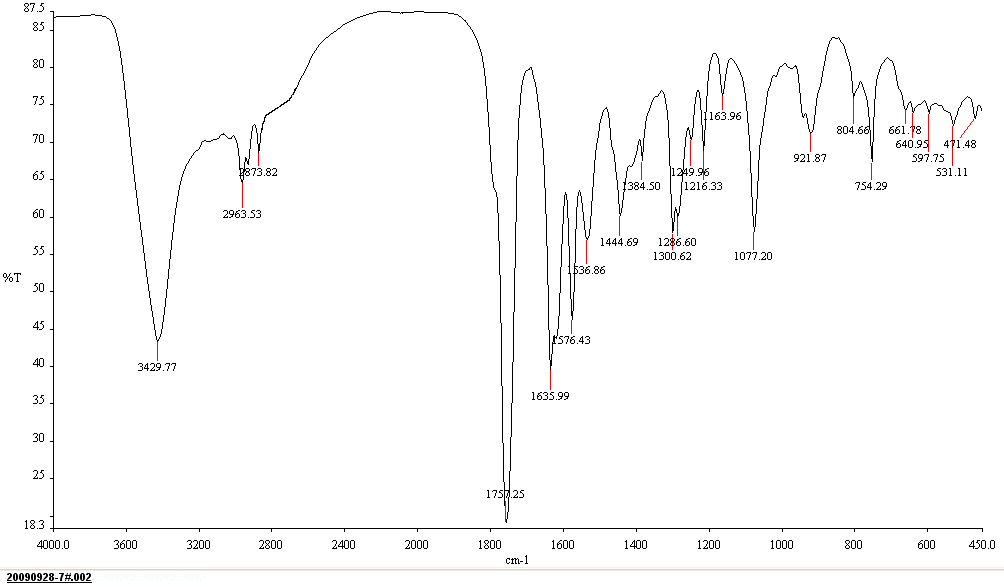


14 TC-5 IR


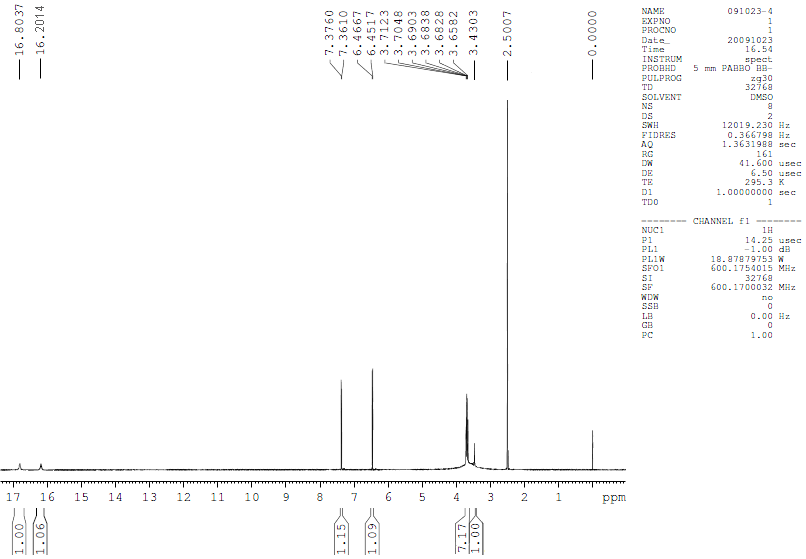


TC-5 1HNMR


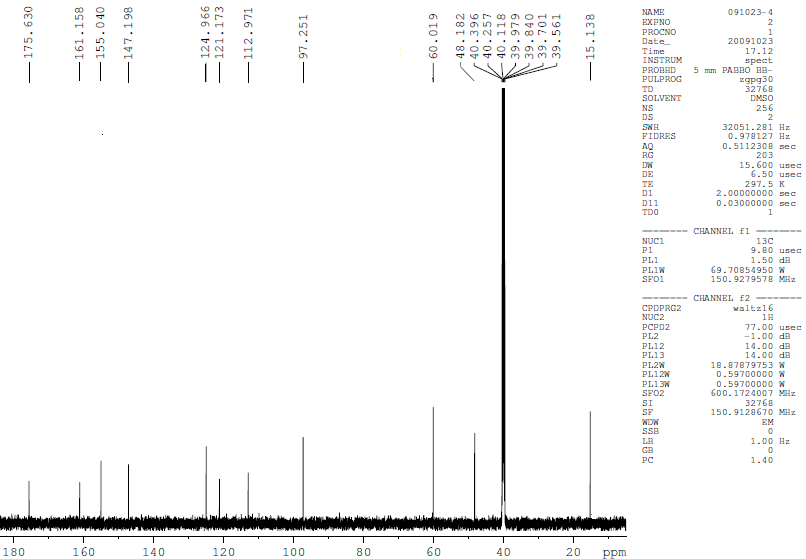


16 TC-5 13CNMR


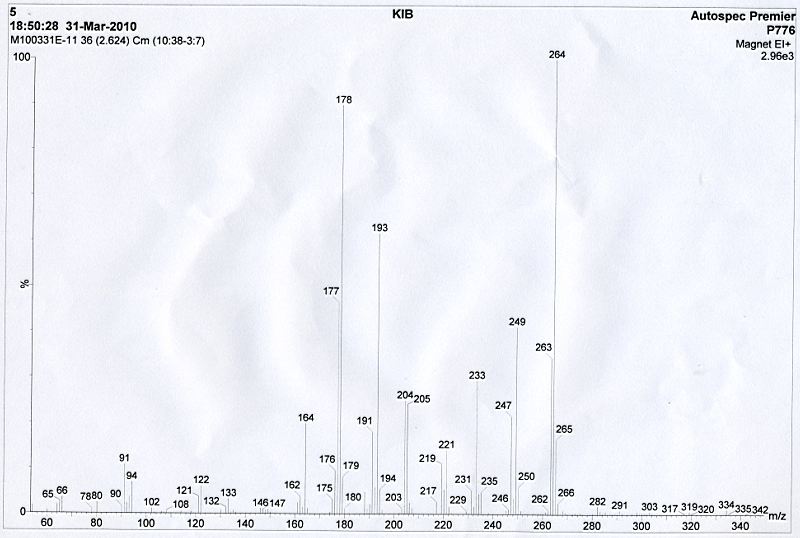


17 TC-6 MS


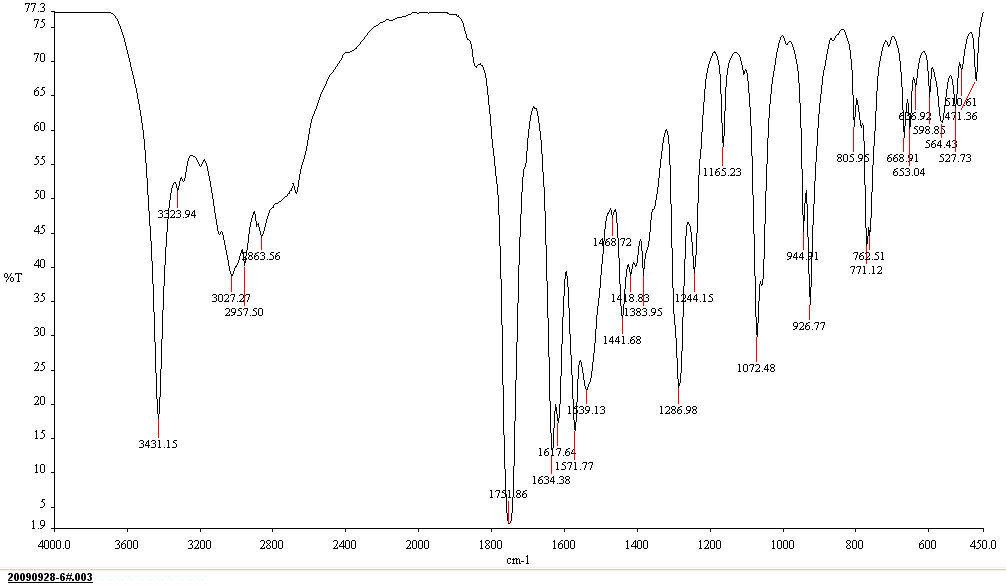


18 TC-6 IR


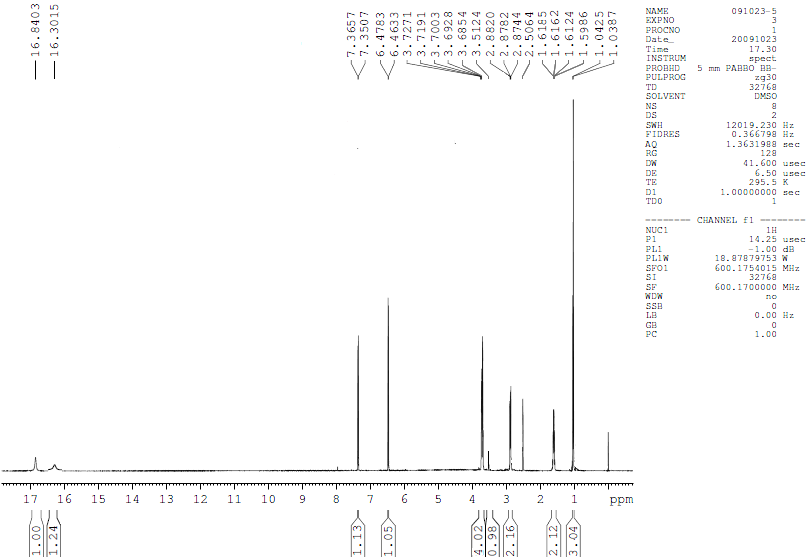


19 TC-6 1HNMR


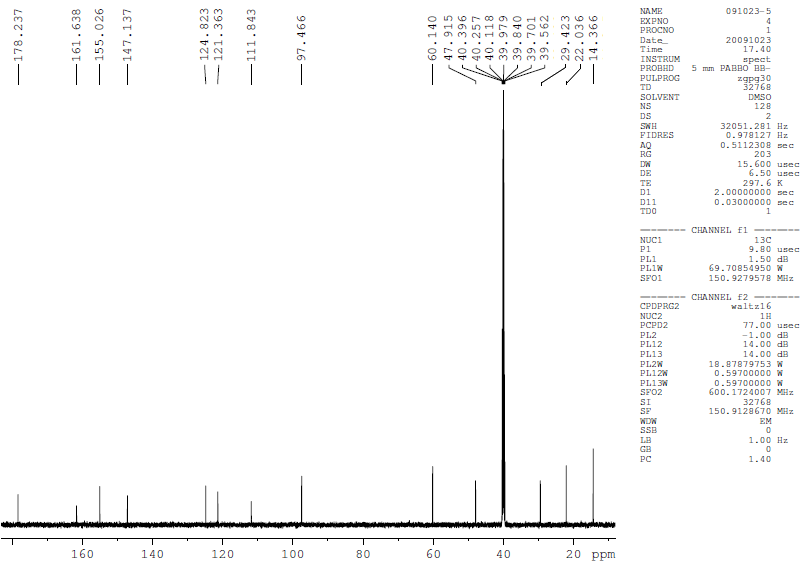


20 TC-6 13CNMR


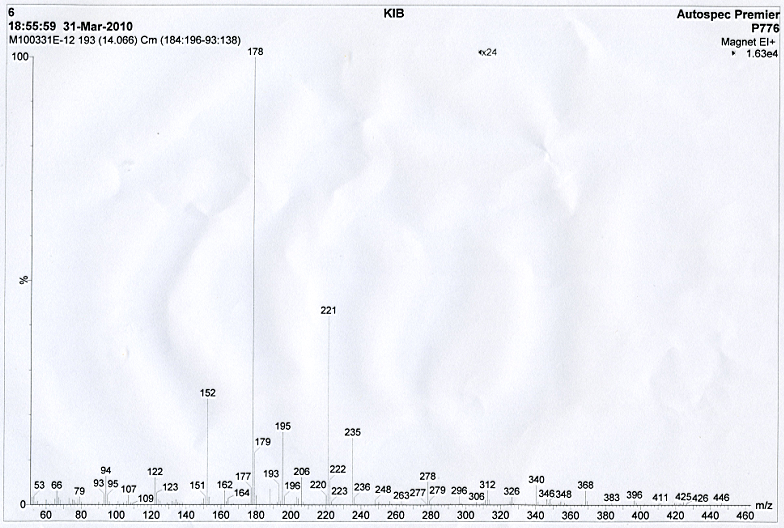


21 TC-7 MS


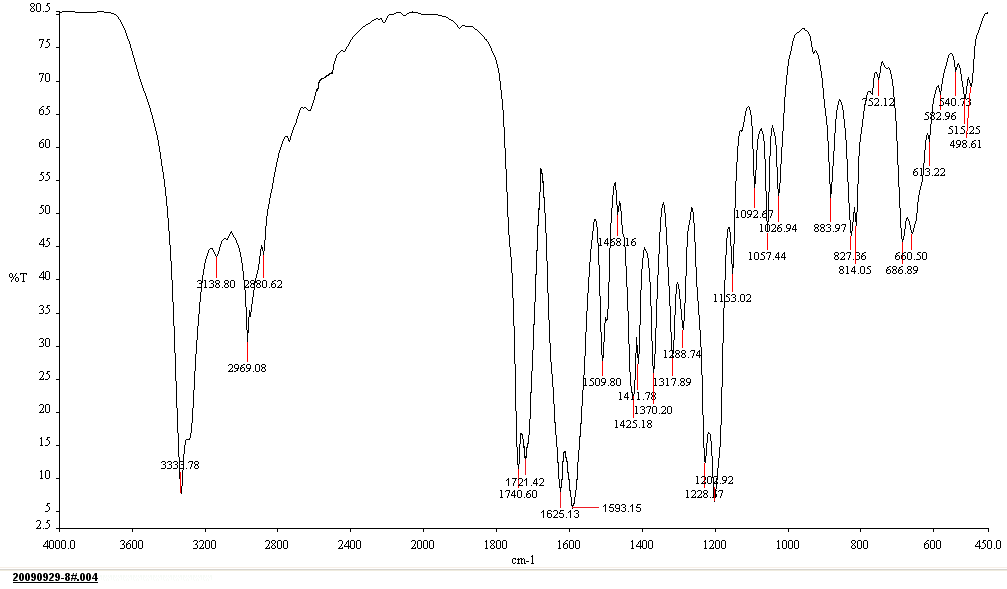


22 TC-7 IR


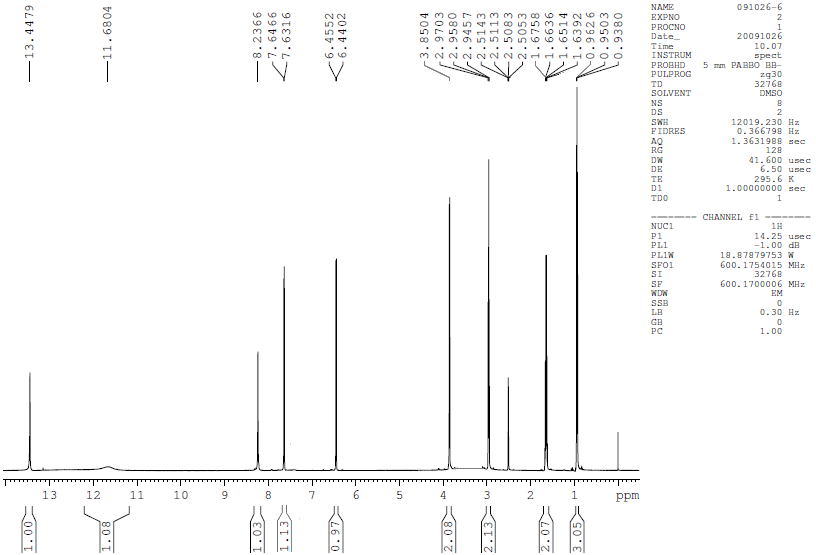


23 TC-7 1HNMR


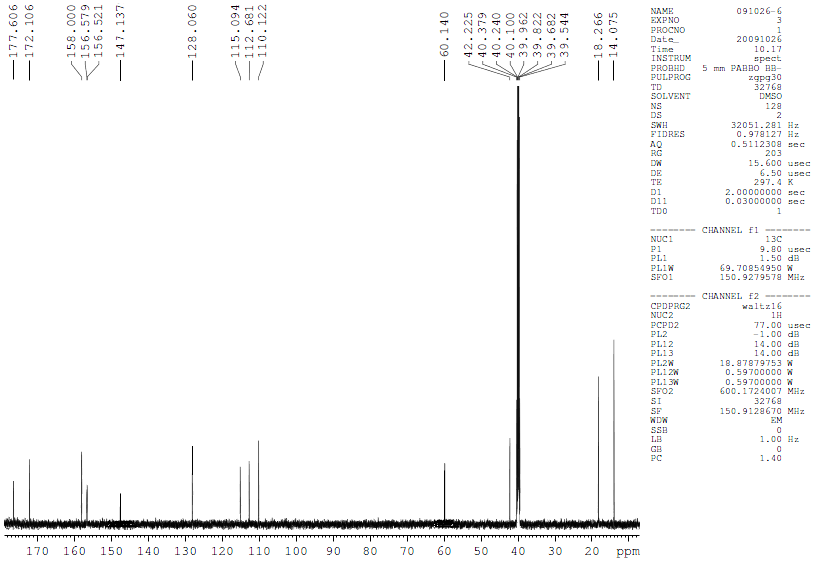


24 TC-7 13CNMR


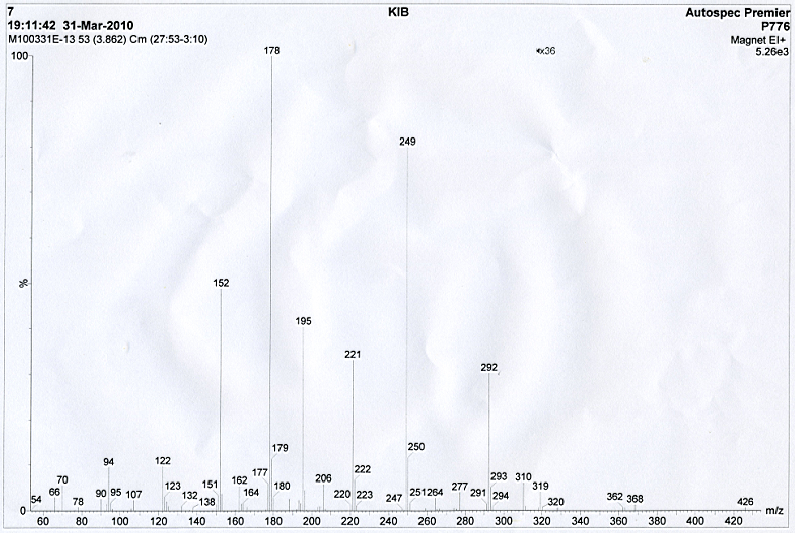


25 TC-8 MS


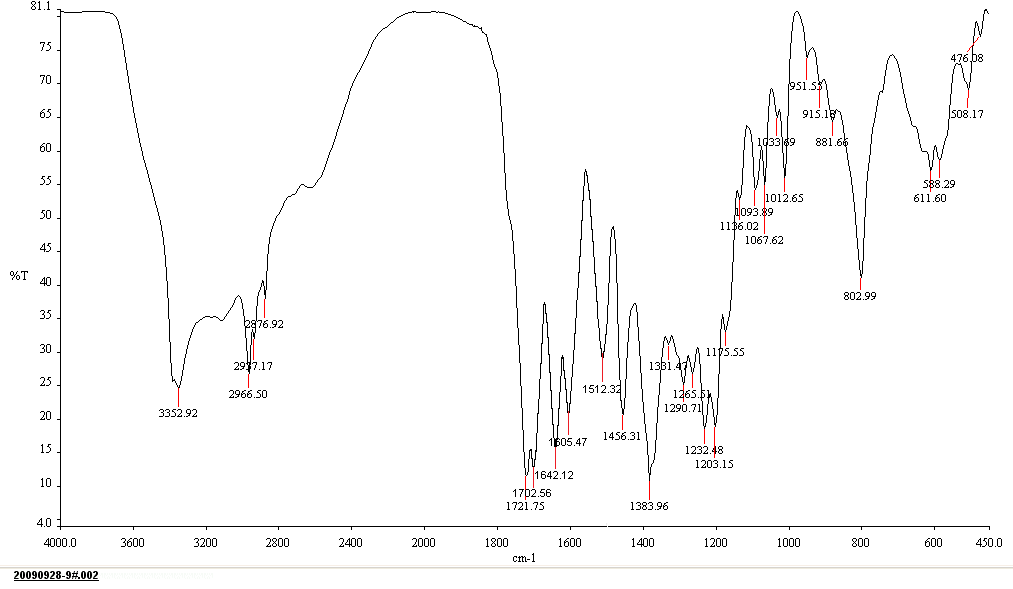


26 TC-8 IR


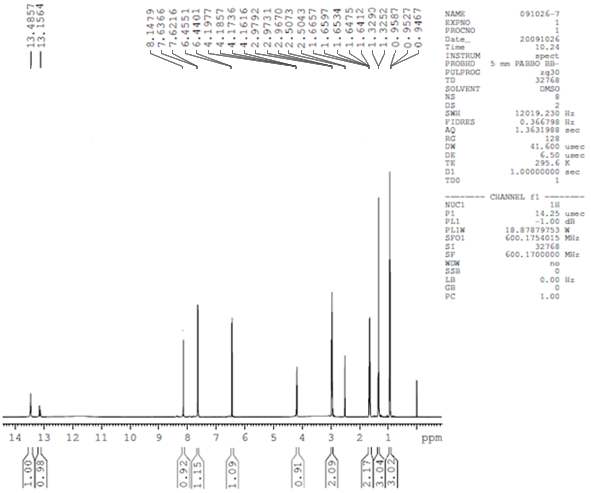


27 TC-8 1HNMR


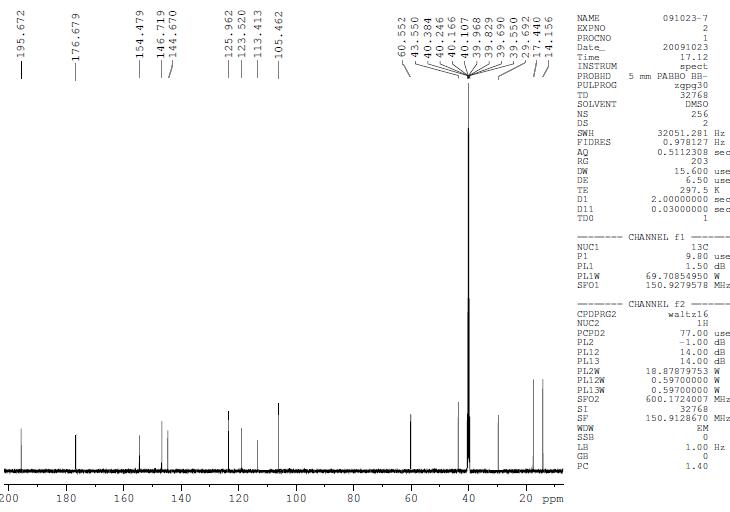


28 TC-8 13CNMR


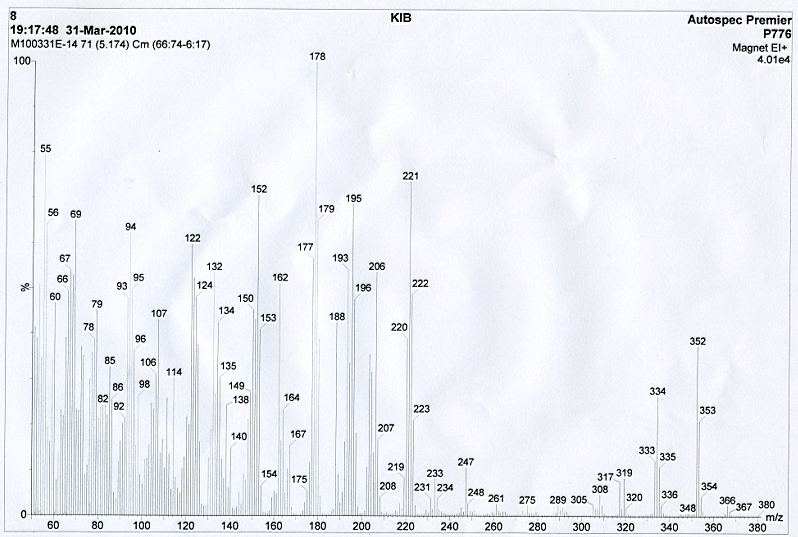


29 TC-9 MS


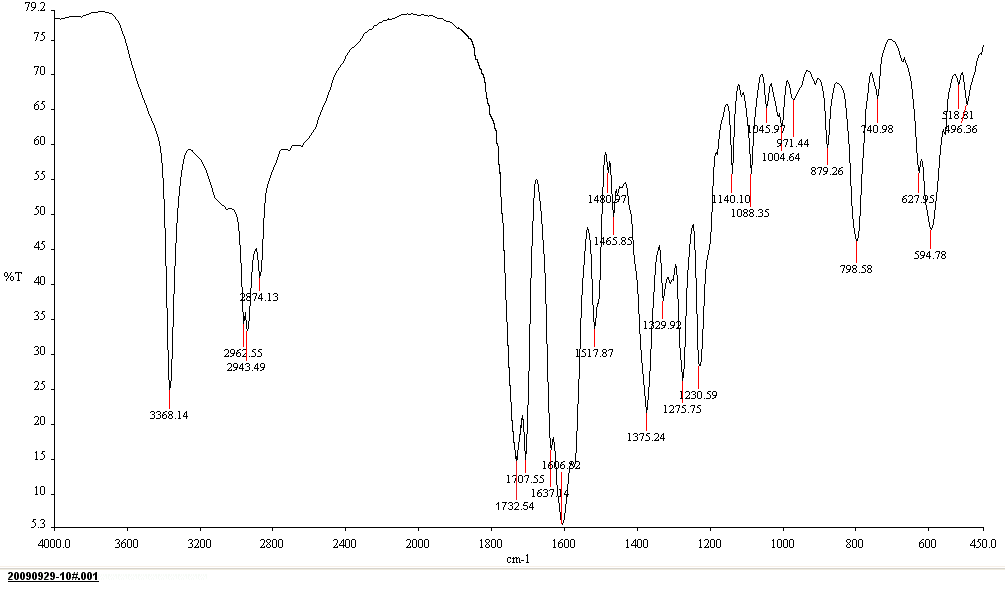


30 TC-9 IR


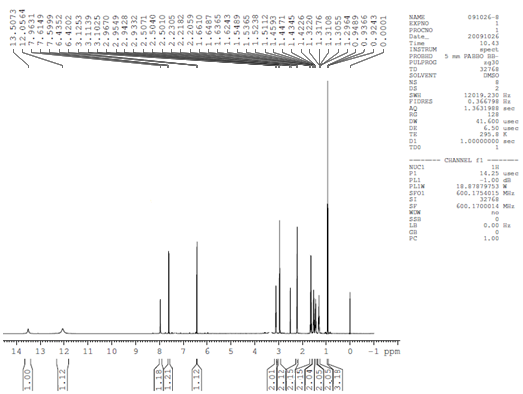


31 TC-9 1HNMR


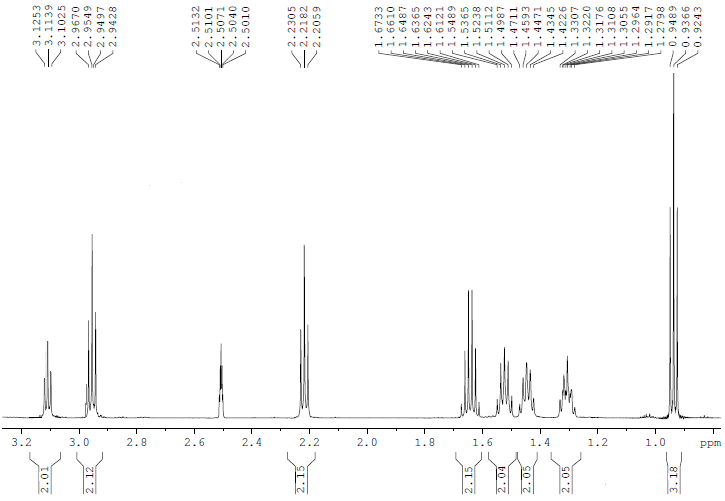


32 TC-9 1HNMR


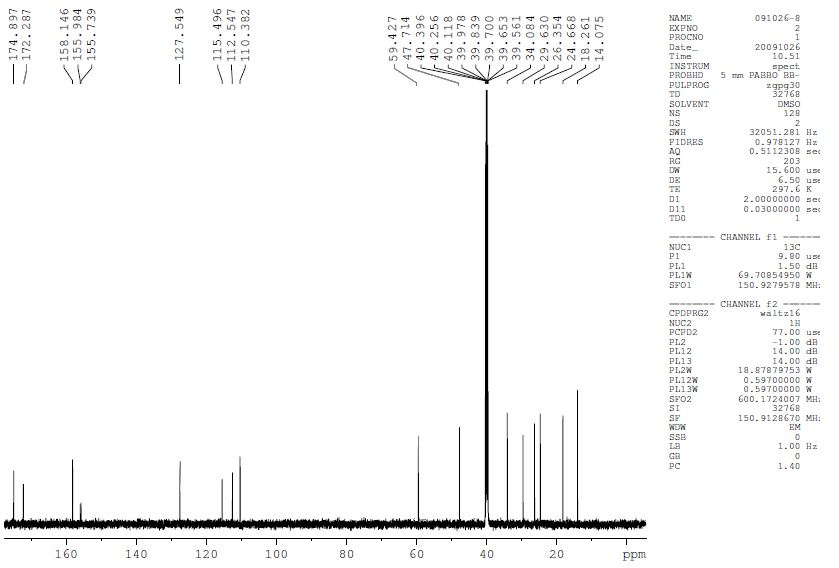


34 TC-9 13CNMR


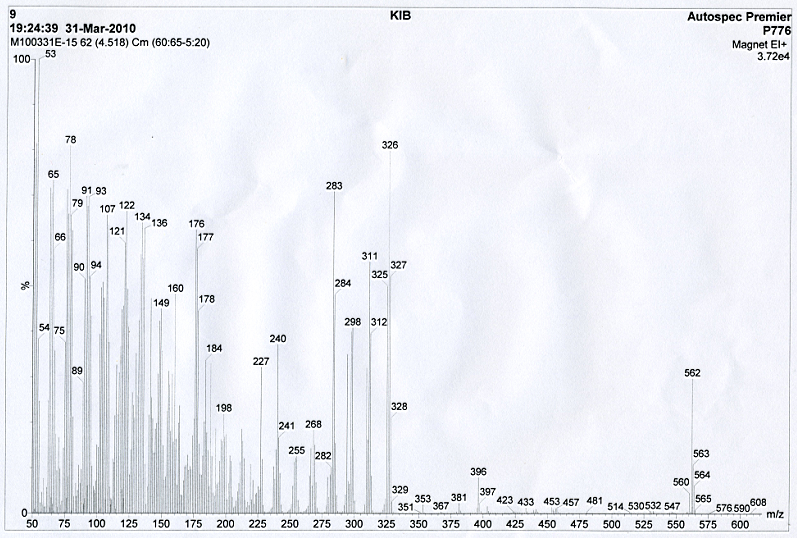


35 TC-10 MS


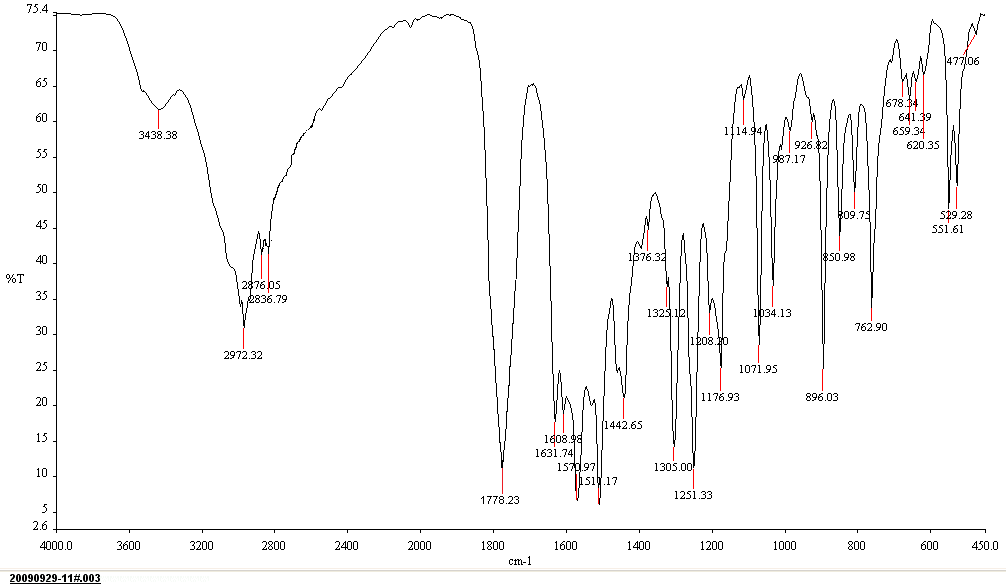


36 TC-10 IR


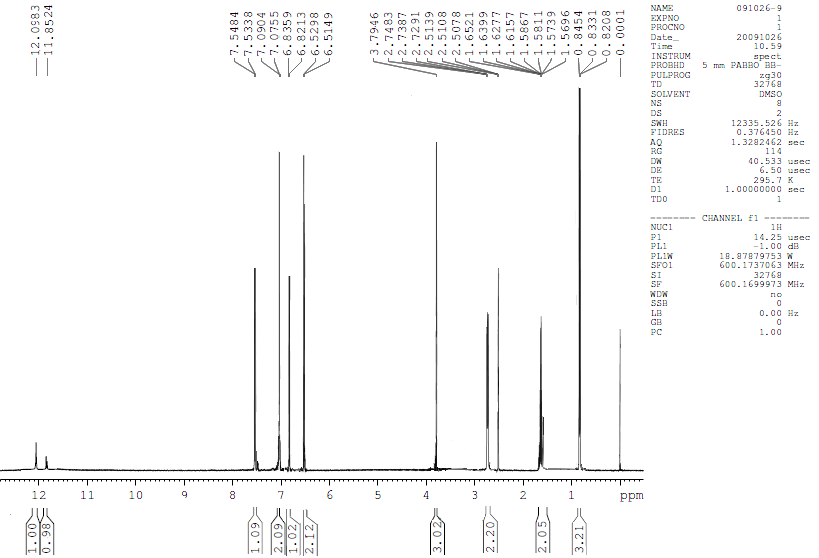


37 TC-10 1HNMR


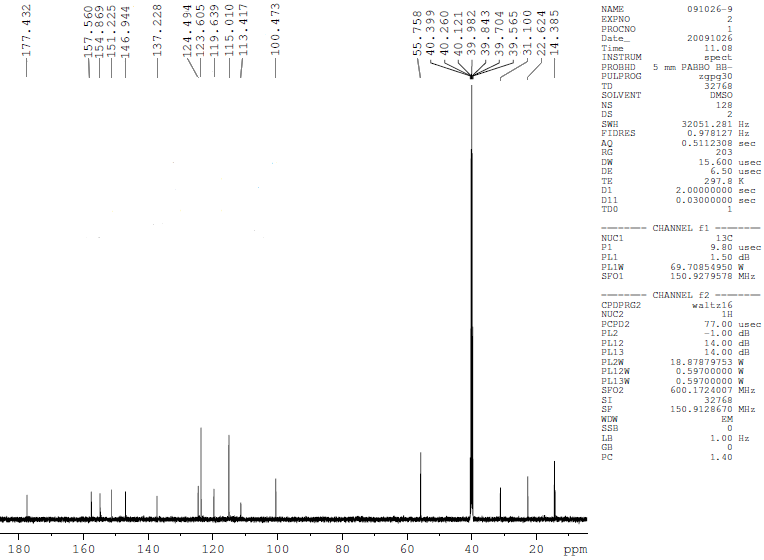


38 TC-10 13CNMR
